# Supplementary material for: The Clarithromycin Susceptibility Genotype Affects the Treatment Outcome of Patients with Mycobacterium abscessus Lung Disease
Source: PubMed Central journal article supplement (PMC5923093; doi:10.1128/aac.02360-17), 2018-04-26
Supplement: AAC.02360-17_zac005187122s1.pdf [file AAC.02360-17_zac005187122s1.pdf]

Supplementary Table 1. Antibiotic resistance of all *M. abscessus* isolates<sup>a</sup>

| Antibiotic                       | Isolates n (%) |                  |           |                           |                                            |                                           |                                           |
|----------------------------------|----------------|------------------|-----------|---------------------------|--------------------------------------------|-------------------------------------------|-------------------------------------------|
|                                  | MIC (mg/mL)    |                  |           | Resistant genotype (n=69) |                                            | Sensitive genotype (n=31)                 |                                           |
|                                  | Sensitive      | Intermediate     | Resistant | <i>rrl</i> mut (n=5)      | <i>rrl</i> wild, <i>erm</i> (41)T28 (n=64) | <i>rrl</i> wild, <i>erm</i> (41)C28 (n=6) | <i>rrl</i> wild, <i>erm</i> (41) M (n=25) |
| CLA (resistant before induction) | ≤2             | 4                | ≥8        | 5 (100.0)                 | 27 (42.2)                                  | 0 (0.0)                                   | 0 (0.0)                                   |
| CLA (resistant after induction)  | ≤2             | 4                | ≥8        | 5 (100.0)                 | 63 (98.4)                                  | 0 (0.0)                                   | 1 (28.0)                                  |
| AMI (amikacin)                   | ≤16            | 32               | ≥64       | 0 (0)                     | 1 (1.6)                                    | 1 (16.7)                                  | 0 (0)                                     |
| SXT (sulfonamides)               | ≤2             | nrb <sup>b</sup> | ≥4        | 2 (40.0)                  | 36 (56.3)                                  | 3 (50.0)                                  | 15 (60.0)                                 |
| MXF (moxifloxacin)               | ≤1             | 2                | ≥4        | 5 (100.0)                 | 63 (98.4)                                  | 6 (100)                                   | 24 (96.0)                                 |
| FOX (cefoxitin)                  | ≤16            | 32-64            | ≥128      | 1 (20.0)                  | 42 (65.6)                                  | 5 (83.3)                                  | 17 (68.0)                                 |
| DOX (doxycycline)                | ≤1             | 2-4              | ≥8        | 5 (100.0)                 | 63 (98.4)                                  | 6 (100)                                   | 25 (100.0)                                |
| TGC (tigecycline)                | ≤1             | nrb              | nrb       | nd <sup>c</sup>           | nd                                         | nd                                        | nd                                        |
| LZD (linezolid)                  | ≤8             | 16               | ≥32       | 3 (60.0)                  | 30 (46.9)                                  | 3 (50.0)                                  | 10 (40.0)                                 |
| IMI (imipenem)                   | ≤4             | 8-16             | ≥32       | 5 (100.0)                 | 61 (95.3)                                  | 6 (100)                                   | 24 (96.0)                                 |
| TOB (tobramycin)                 | ≤2             | 4                | ≥8        | 4 (80.0)                  | 56 (87.5)                                  | 6 (100)                                   | 24 (96.0)                                 |

<sup>a</sup>The *erm*(41) sequevar-dependent resistance of 100 *M. abscessus* isolates to the antibiotic indicated was determined by the microdilution method. The incubation time was 3 days (before induction) and 14 days (after induction) for CLA, and 3 days for the other antibiotics listed. MIC = minimum inhibitory concentration.

<sup>b</sup>no recommended breakpoint.

<sup>c</sup>no data.

Supplementary Table 2. Relapse among patients infected with four *M. abscessus* genotype groups

|                                                          | Resistant group |               | Sensitive group |             | <i>P</i> value |
|----------------------------------------------------------|-----------------|---------------|-----------------|-------------|----------------|
|                                                          | rrl<br>(n=5)    | T28<br>(n=64) | C28<br>(n=6)    | M<br>(n=25) |                |
| Duration of treatment, mean month                        | 10.5            | 8.1           | 6.0             | 1.0         | 0.257          |
| Patients defined as relapse*                             | 2 (40.0)        | 8 (12.5)      | 3 (50.0)        | 1 (4.0)     | 0.009          |
| Sputum relapse after initial<br>smear/culture conversion | 2 (40.0)        | 7 (10.9)      | 2 (33.3)        | 1 (4.0)     | 0.049          |
| Radiological progressed without<br>sputum relapse        | 2 (40.0)        | 8 (12.5)      | 3 (50.0)        | 0 (0)       | 0.003          |

\*Data are the number and (percentage) of patients infected with each genotype. Significant differences between the resistant and sensitive groups are indicated by a *P* value <0.05.

Supplementary Figure 1. Comparison of initial sputum smear/culture conversion rate among 4 genotypes

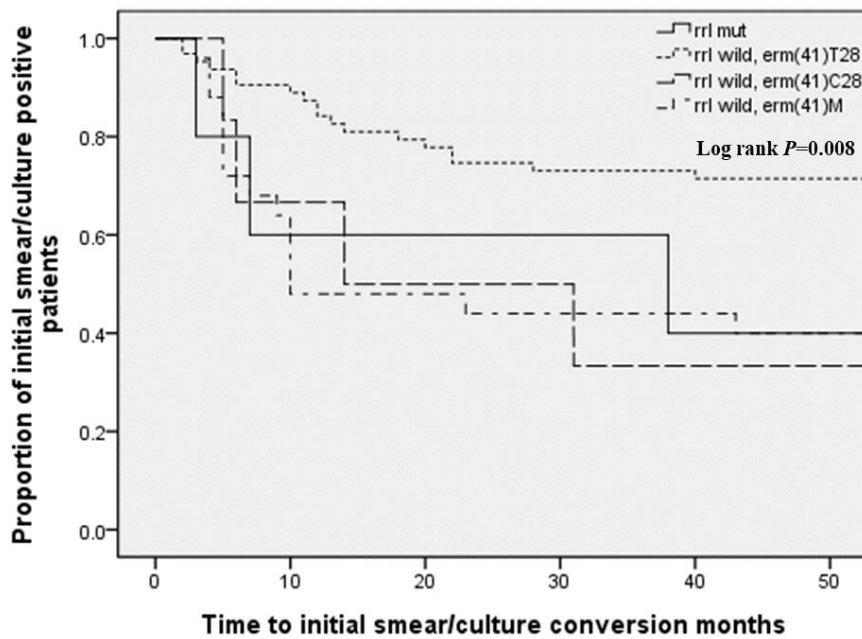

**Supplementary Figure 1.** Comparison of initial sputum smear/culture conversion rate among patients infected with the genotype groups indicated. Patients infected with the resistant, *rrl* mut and *rrl* wild/*erm*(41)T28 genotypes showed a significantly longer initial sputum medium conversion time than patients infected with the two sensitive genotypes,  $P = 0.008$ .
